# Supplementary material for: Mixed-ligand copper(ii) Schiff base complexes: the vital role of co-ligands in DNA/protein interactions and cytotoxicity
Source: Royal Society of Chemistry journal article supplement (doi:10.1039/c6nj03501a), 2016-12-22
Supplement: c6nj03501a1.pdf [file c6nj03501a1.pdf]

## Supporting information

### Mixed-ligand copper(II) Schiff base complexes: the vital role of co-ligands in DNA/protein interactions and cytotoxicity

Sellamuthu Kathiresan<sup>a</sup>, Subramanian Mugesh<sup>b</sup> and Jamespandi Annaraj<sup>\*a</sup>

<sup>a</sup>Department of Materials Science, School of Chemistry, Madurai Kamaraj University, Madurai-625 021, Tamil Nadu, India. E-mail: annaraj.chem@mkuniversity.org

<sup>b</sup>Department of Microbial Technology, School of Biological Sciences, Madurai Kamaraj University, Madurai-625 021, Tamil Nadu, India

---

#### Figure captions

**Fig S1.** <sup>1</sup>H NMR spectra of L and Cu(II) complexes.

**Fig S2.** ESI-MS spectrum of L.

**Fig S3.** ESI-MS spectrum of complex 1.

**Fig S4.** ESI-MS spectrum of complex 2.

**Fig S5.** ESI-MS spectrum of complex 3.

**Fig S6.** ESI-MS spectrum of complex 4.

**Fig S7.** Stability properties of L and complexes 1-4.

**Fig S8.** DNA studies of CV in complexes 2 and 3.

**Fig S9.** DNA studies of DPV in complexes 2 and 3.

**Fig S10.** Antibacterial activity of compound with *Pseudomonas aeruginosa* and *S. aureus*.

**Fig S11.** Cell viability of AGS gastric cancer cells after exposure with L for 24 h.

**Table S1.** Calculate binding energy in molecular docking studies.

**Table S2.** Means of inhibition zones diameter obtained by agar well diffusion method.

**Table S3.** Means of inhibition zones diameter in *Staphylococcus aureus*.

**Table S4.** Means of inhibition zones diameter in *Pseudomonas aeruginosa*.

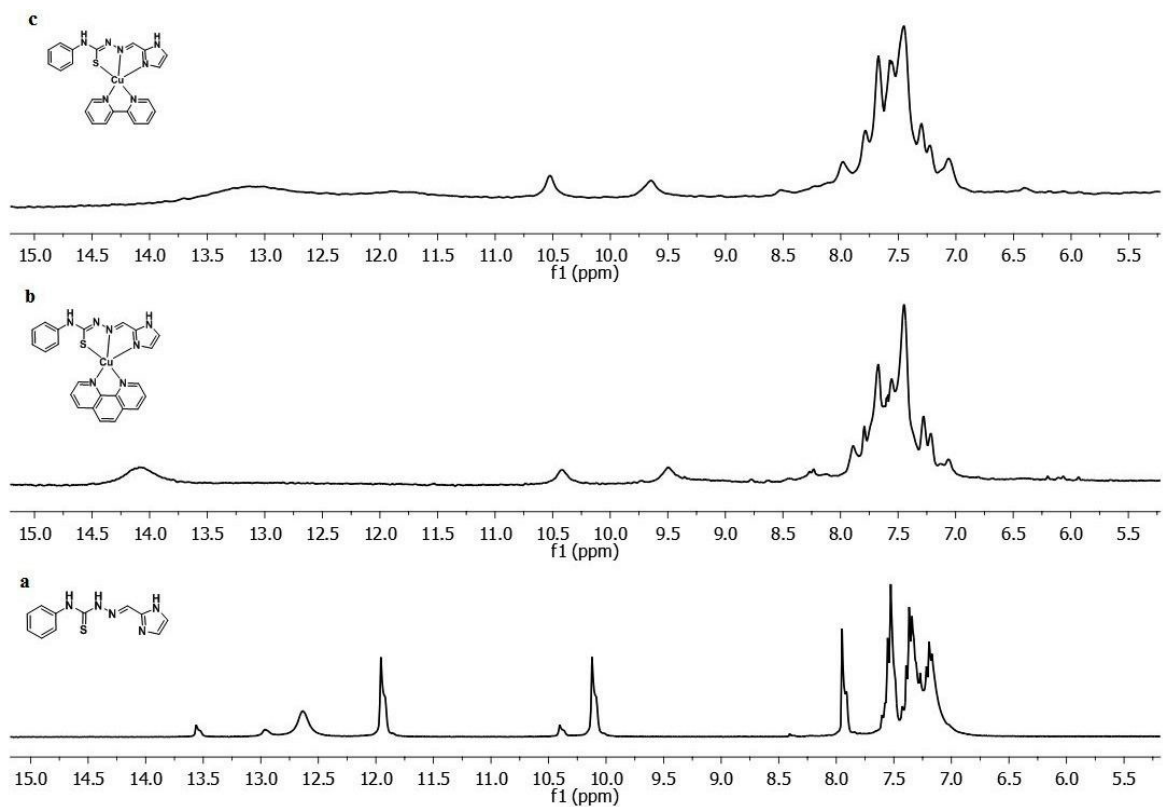

**Fig. S1** <sup>1</sup>H NMR spectra of (a) ligand using DMSO-d<sub>6</sub> solvent (b) Cu(II) complexes of **1** and (c) **2** using in CD<sub>3</sub>CN solvent.

166AL #18 RT: 0.22 AV: 1 NL: 8.57E3  
T: ITMS - c ESI Full ms [50.00-1000.00]

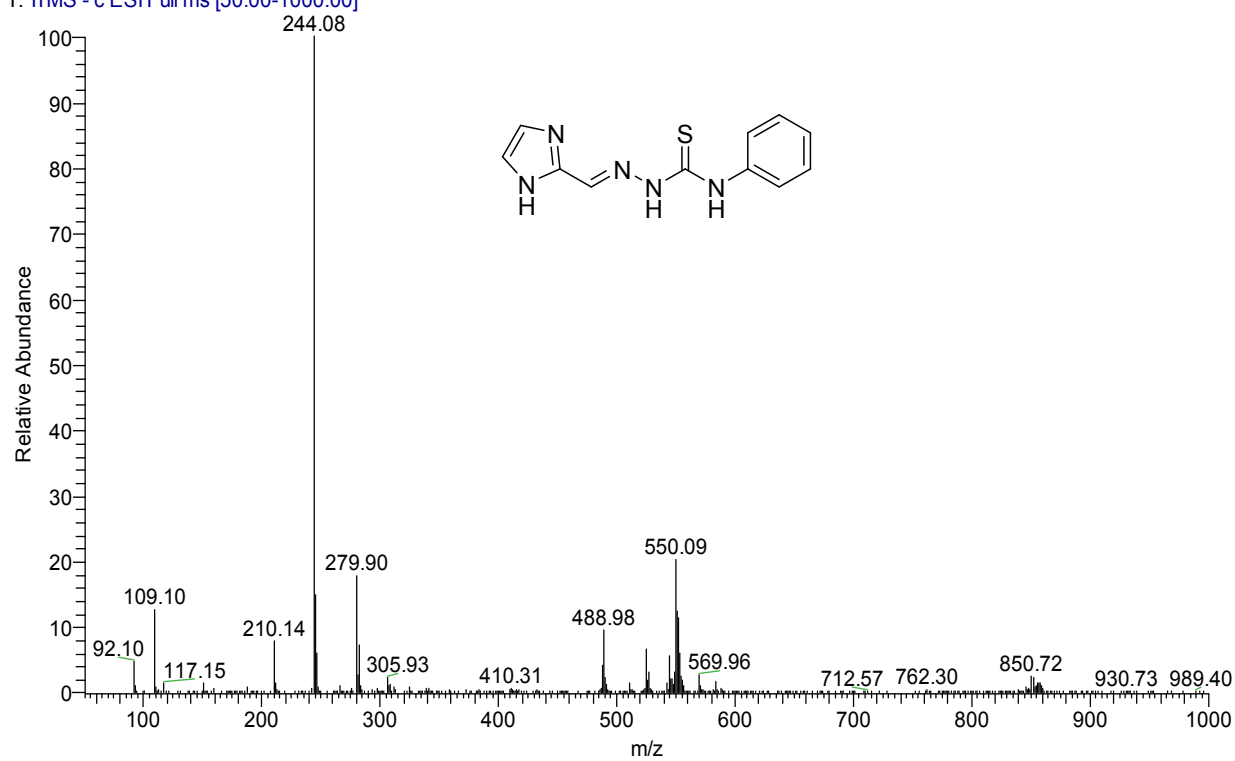

Fig. S2 ESI-MS spectrum of L.

166APHEN #11 RT: 0.14 AV: 1 NL: 2.32E4  
T: ITMS + c ESI Full ms [50.00-1100.00]

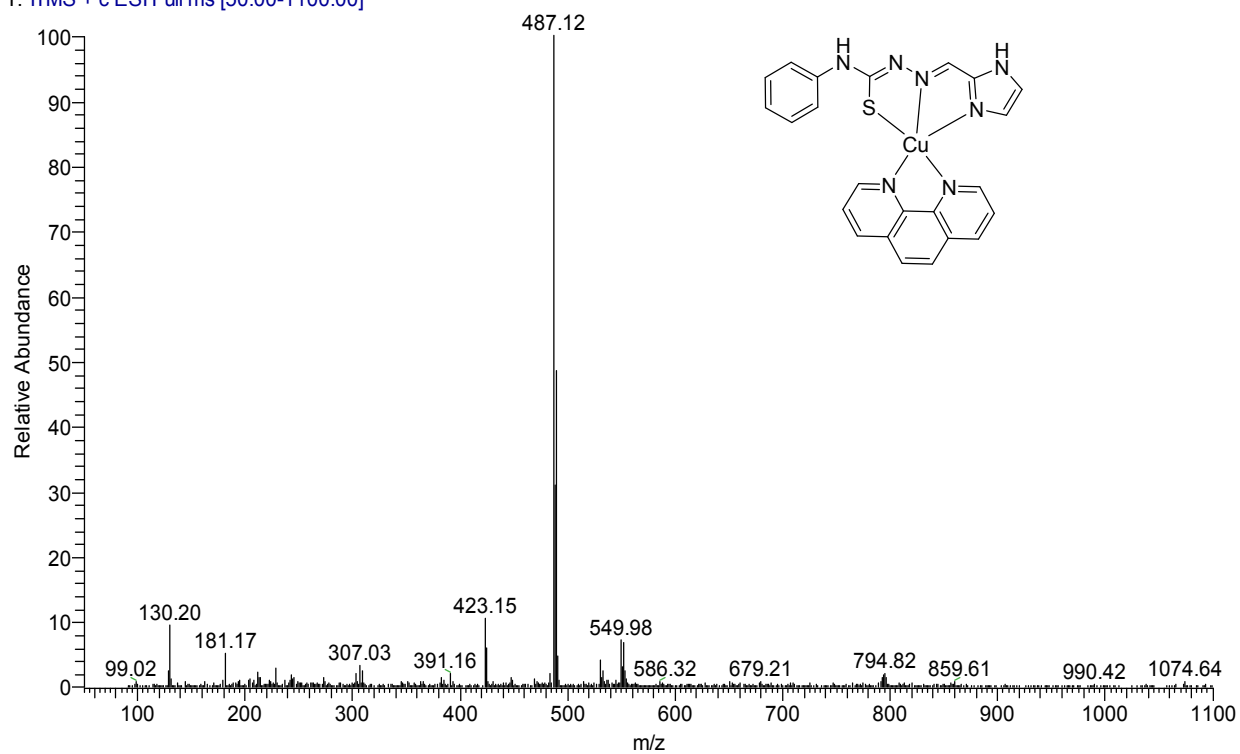

**Fig. S3** ESI-MS spectrum of complex 1.

166AbPy#19 RT: 0.25 AV: 1 NL: 7.86E3  
T: ITMS + c ESI Full ms [50.00-1100.00]

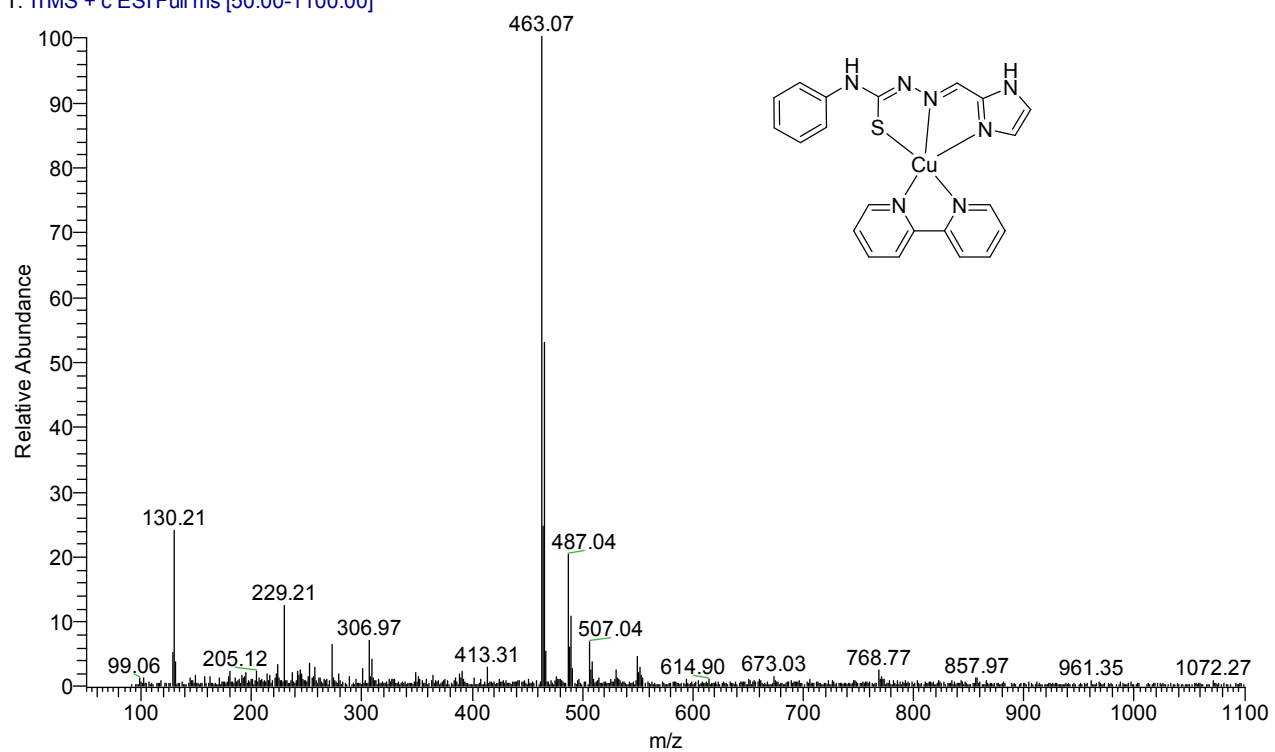

**Fig. S4** ESI-MS spectrum of complex **2**.

166ADMBPY#31 RT: 0.41 AV: 1 NL: 1.08E4  
T: ITMS + c ESI Full ms [50.00-1100.00]

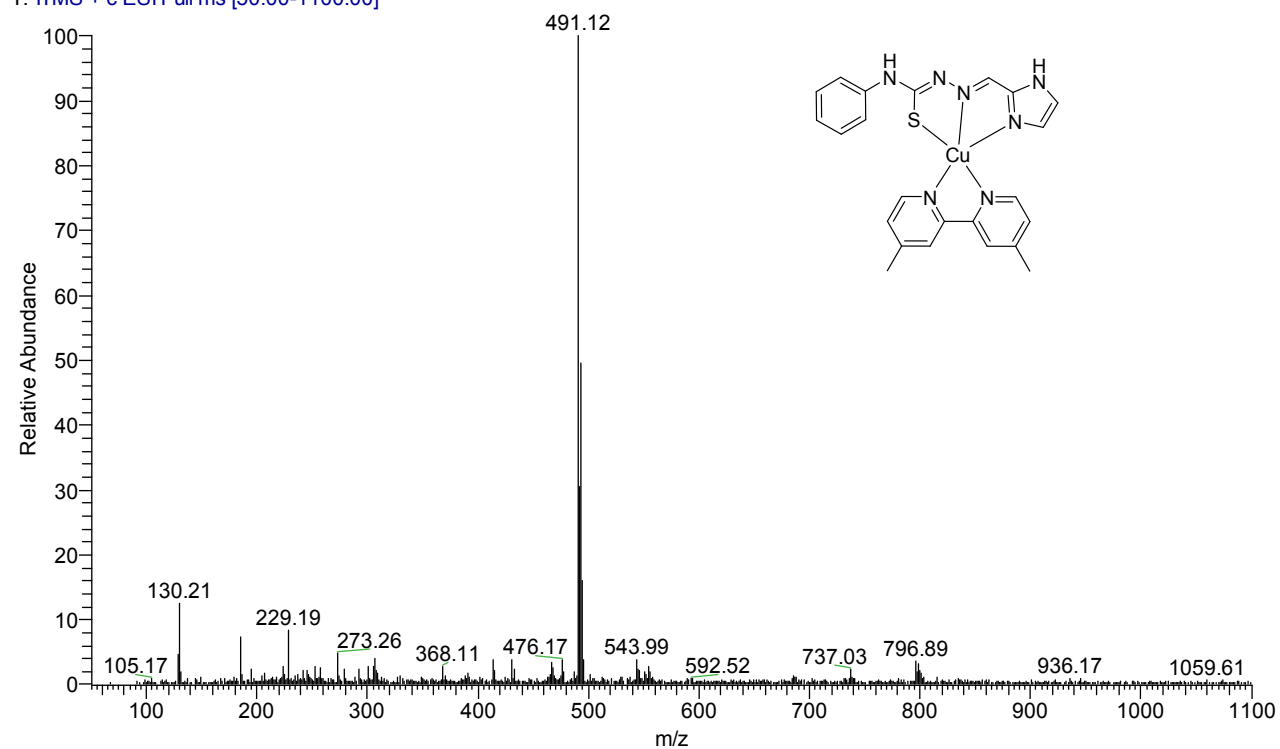

Fig. S5 ESI-MS spectrum of complex 3.

166DIPYRI#27 RT: 0.36 AV: 1 NL: 1.51E3  
T: ITMS + c ESI Full ms [50.00-1100.00]

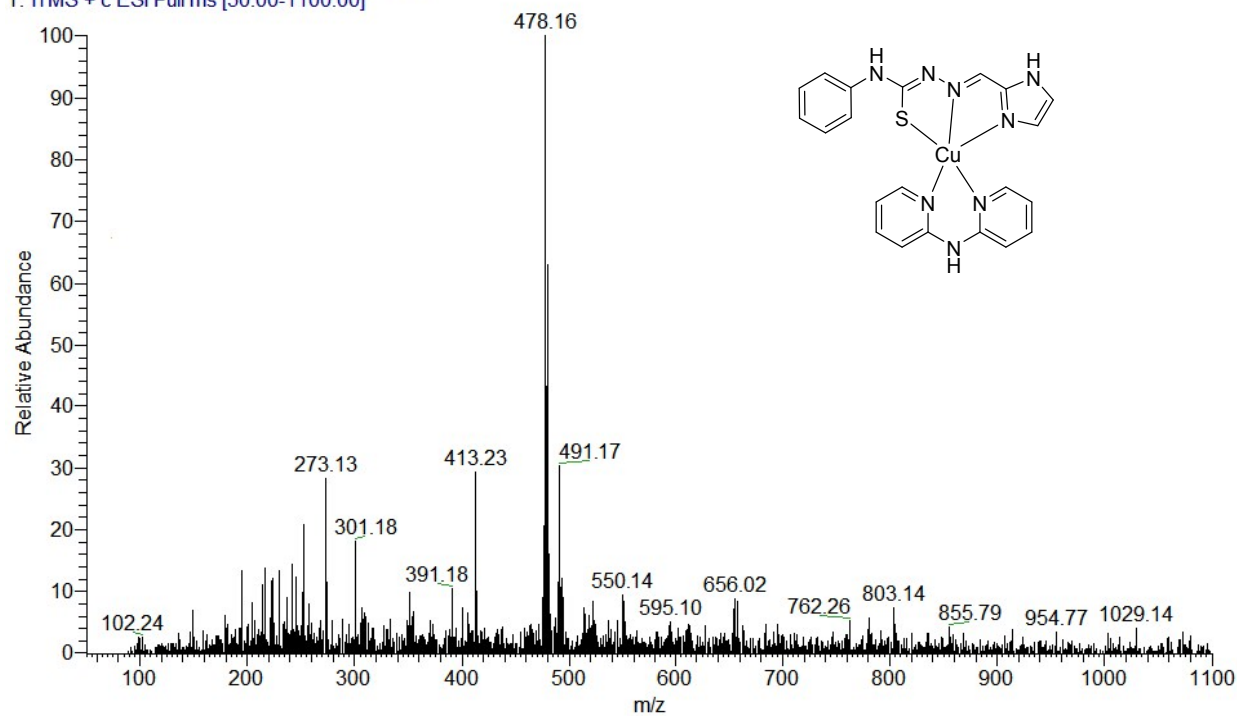

Fig. S6 ESI-MS spectrum of complex 4.

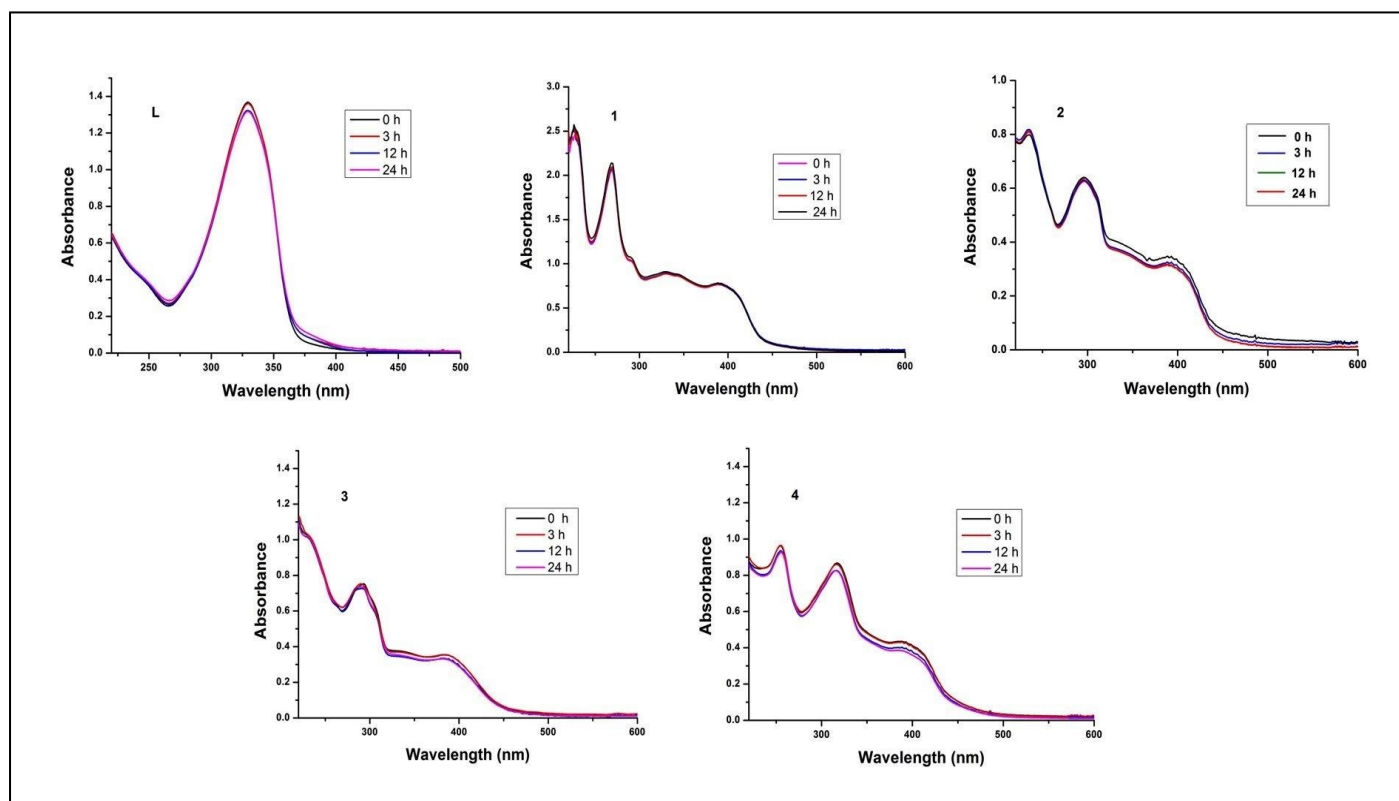

Fig. S7 Stability of L and complexes 1-4 were monitored for 0-24 h in MeOH/Tris-HCl buffer solution at room temperature.

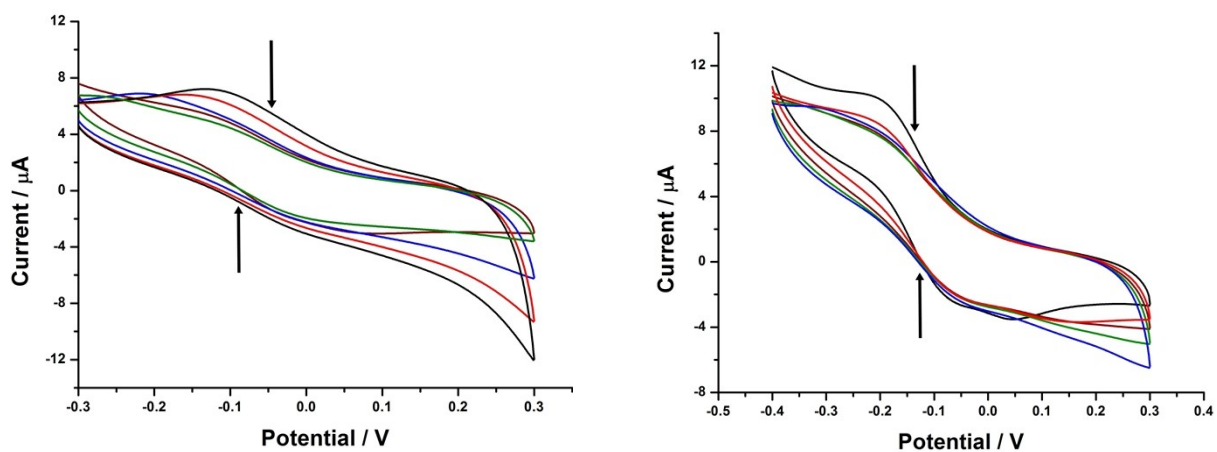

**Fig. S8** CV of complexes **2** and **3** in the absence and presence of HS-DNA at scan rate of 100 mV/s.

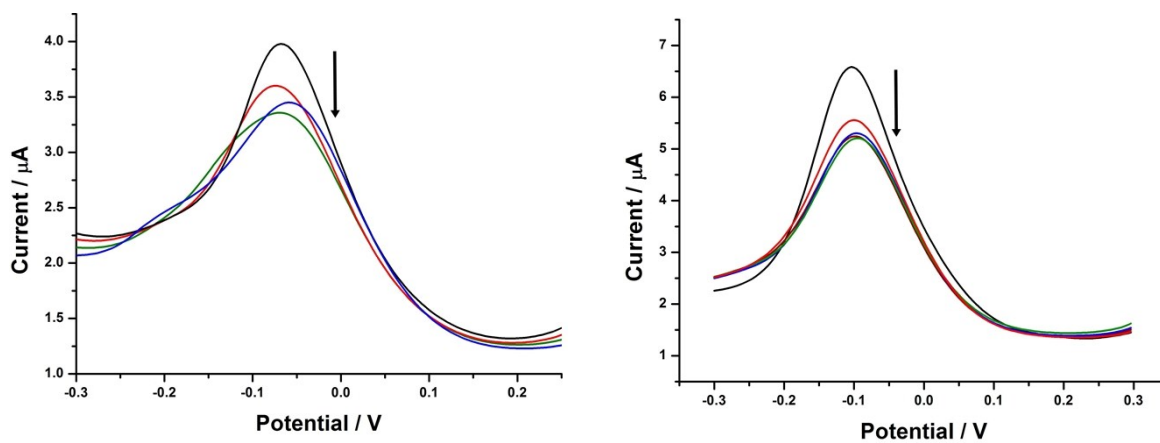

**Fig. S9** DPV of complexes **2** and **3** in the absence and presence of HS-DNA in buffer/CH<sub>3</sub>CN solution.



*P. aeruginosa*

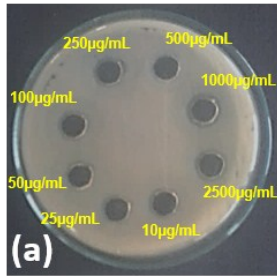

*S. aureus*

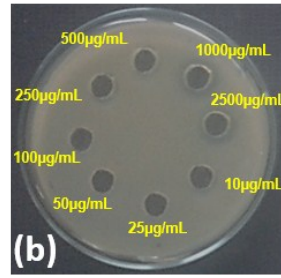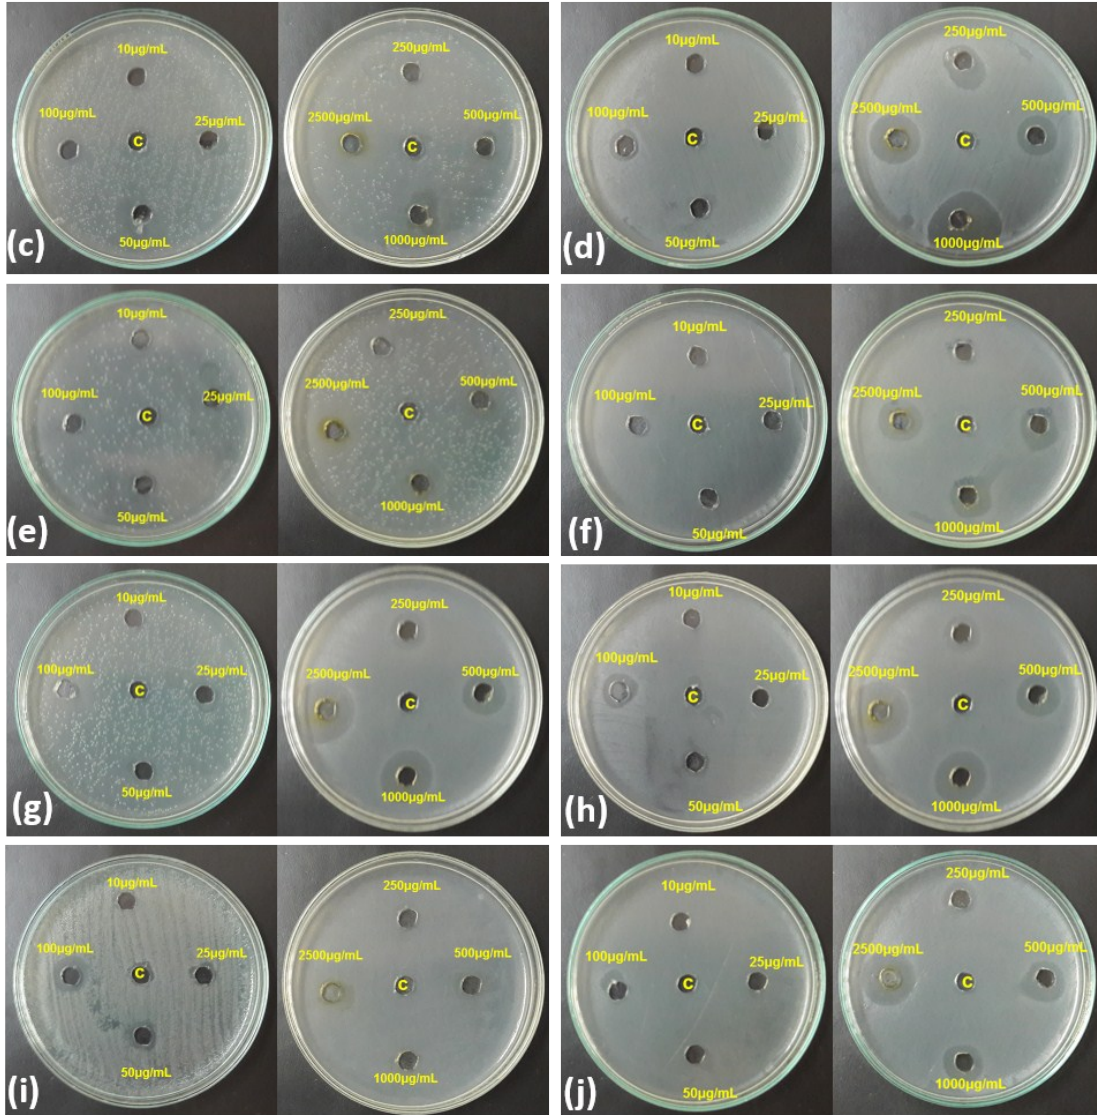

**Fig. S10** Antibacterial activity of compound with *Pseudomonas aeruginosa* [(a) L (c) 1 (e) 2 (g) 3 and (i) 4] and *S. aureus* [(b) L (d) 1 (f) 2 (h) 3 and (j) 4].

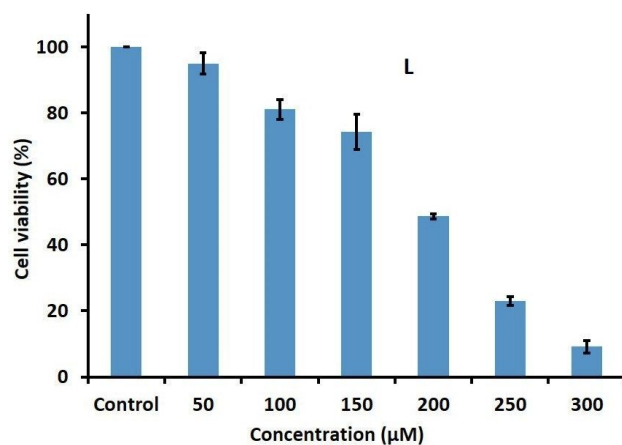

**Fig. S11** Cell viability of AGS gastric cancer cells after exposure with L for 24 h.

**Table S1** The calculated free energy, inhibitory constant and binding region of the Cu(II) complexes with B-DNA (1BNA)

| Complexes | Free energy of binding (FEB) (kcal/mol) | Inhibitory constant (µM) | Binding region                      |
|-----------|-----------------------------------------|--------------------------|-------------------------------------|
| 1         | -4.66                                   | 383.0                    | Guanine, Cytosine, Adenine          |
| 2         | -4.19                                   | 845.4                    | Guanine, Cytosine                   |
| 3         | -4.34                                   | 658.3                    | Guanine, Cytosine, Adenine          |
| 4         | -3.99                                   | 1190.0                   | Guanine, Cytosine, Adenine, Thymine |

**Table S2** Means of inhibition zones diameter obtained by agar well diffusion method against *Staphylococcus aureus* and *Pseudomonas aeruginosa*.

| Complex  | Means of zones of bacterial growth inhibition (mm) |                      |
|----------|----------------------------------------------------|----------------------|
|          | <i>S. aureus</i>                                   | <i>P. aeruginosa</i> |
| <b>1</b> | 14                                                 | 17                   |
| <b>2</b> | 12                                                 | 14                   |
| <b>3</b> | 13                                                 | 15                   |
| <b>4</b> | 12                                                 | 11                   |

**Table S3:** Means of inhibition zones diameter obtained by agar well diffusion method against *Staphylococcus aureus*.

| Compound | Zones of growth inhibition (mm) |               |               |                |                |                |                 |                 |
|----------|---------------------------------|---------------|---------------|----------------|----------------|----------------|-----------------|-----------------|
|          | 10<br>(µg/mL)                   | 25<br>(µg/mL) | 50<br>(µg/mL) | 100<br>(µg/mL) | 250<br>(µg/mL) | 500<br>(µg/mL) | 1000<br>(µg/mL) | 2500<br>(µg/mL) |
| L        | 7                               | 7             | 7             | 8              | 9              | 9              | 10              | 10              |
| <b>1</b> | 10                              | 10            | 11            | 13             | 15             | 16             | 18              | 22              |
| <b>2</b> | 10                              | 10            | 10            | 11             | 13             | 14             | 16              | 17              |
| <b>3</b> | 10                              | 10            | 10            | 12             | 14             | 16             | 19              | 17              |
| <b>4</b> | 10                              | 10            | 10            | 10             | 12             | 14             | 15              | 20              |

**Table S4:** Means of inhibition zones diameter obtained by agar well diffusion method against *Pseudomonas aeruginosa*.

| Compound | <i>Zones of growth inhibition (mm)</i> |                            |                            |                             |                             |                             |                              |                              |
|----------|----------------------------------------|----------------------------|----------------------------|-----------------------------|-----------------------------|-----------------------------|------------------------------|------------------------------|
|          | 10<br>( $\mu\text{g/mL}$ )             | 25<br>( $\mu\text{g/mL}$ ) | 50<br>( $\mu\text{g/mL}$ ) | 100<br>( $\mu\text{g/mL}$ ) | 250<br>( $\mu\text{g/mL}$ ) | 500<br>( $\mu\text{g/mL}$ ) | 1000<br>( $\mu\text{g/mL}$ ) | 2500<br>( $\mu\text{g/mL}$ ) |
| L        | 6                                      | 6                          | 6                          | 6                           | 8                           | 8                           | 11                           | 11                           |
| <b>1</b> | 11                                     | 11                         | 16                         | 18                          | 19                          | 20                          | 21                           | 23                           |
| <b>2</b> | 10                                     | 10                         | 14                         | 15                          | 14                          | 17                          | 18                           | 20                           |
| <b>3</b> | 10                                     | 11                         | 12                         | 16                          | 17                          | 18                          | 20                           | 22                           |
| <b>4</b> | 10                                     | 10                         | 10                         | 10                          | 12                          | 13                          | 14                           | 15                           |
